# Supplementary material for: Multiscale Molecular Modeling–Directed ROS-Responsive Nanotherapy for Dual-Axis Regulation of Fibrotic and Inflammatory Signaling in Alport Nephropathy
Source: Research Square preprint supplement (doi:10.21203/rs.3.rs-8451223/v1), 2026-01-14
Supplement: Supplementary file 1 [file 6dfeab0aa0d8834c90600a8d.docx]

**Supplementary data**

**Figure S1.** A computational workflow for docking, MD simulation, and mechanistic analysis of HDAC and JNK targets.

**
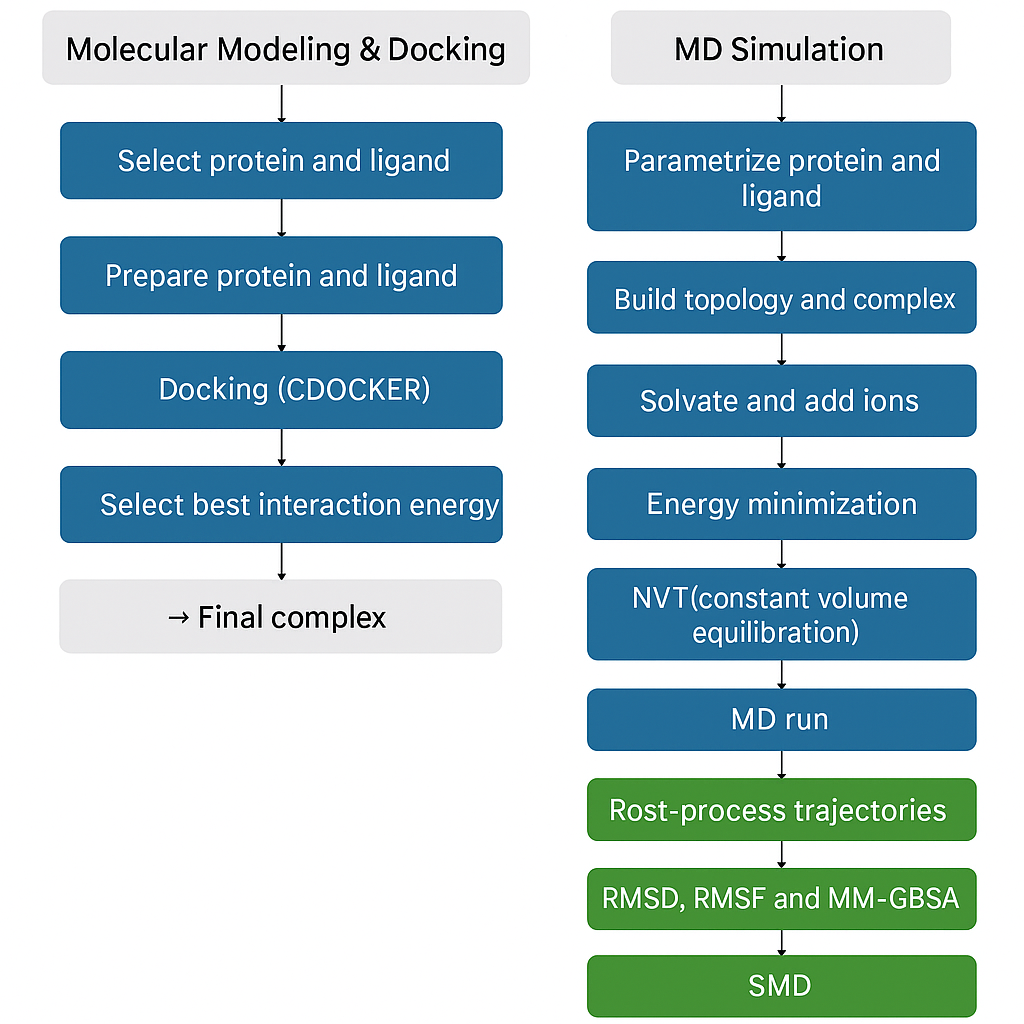
**


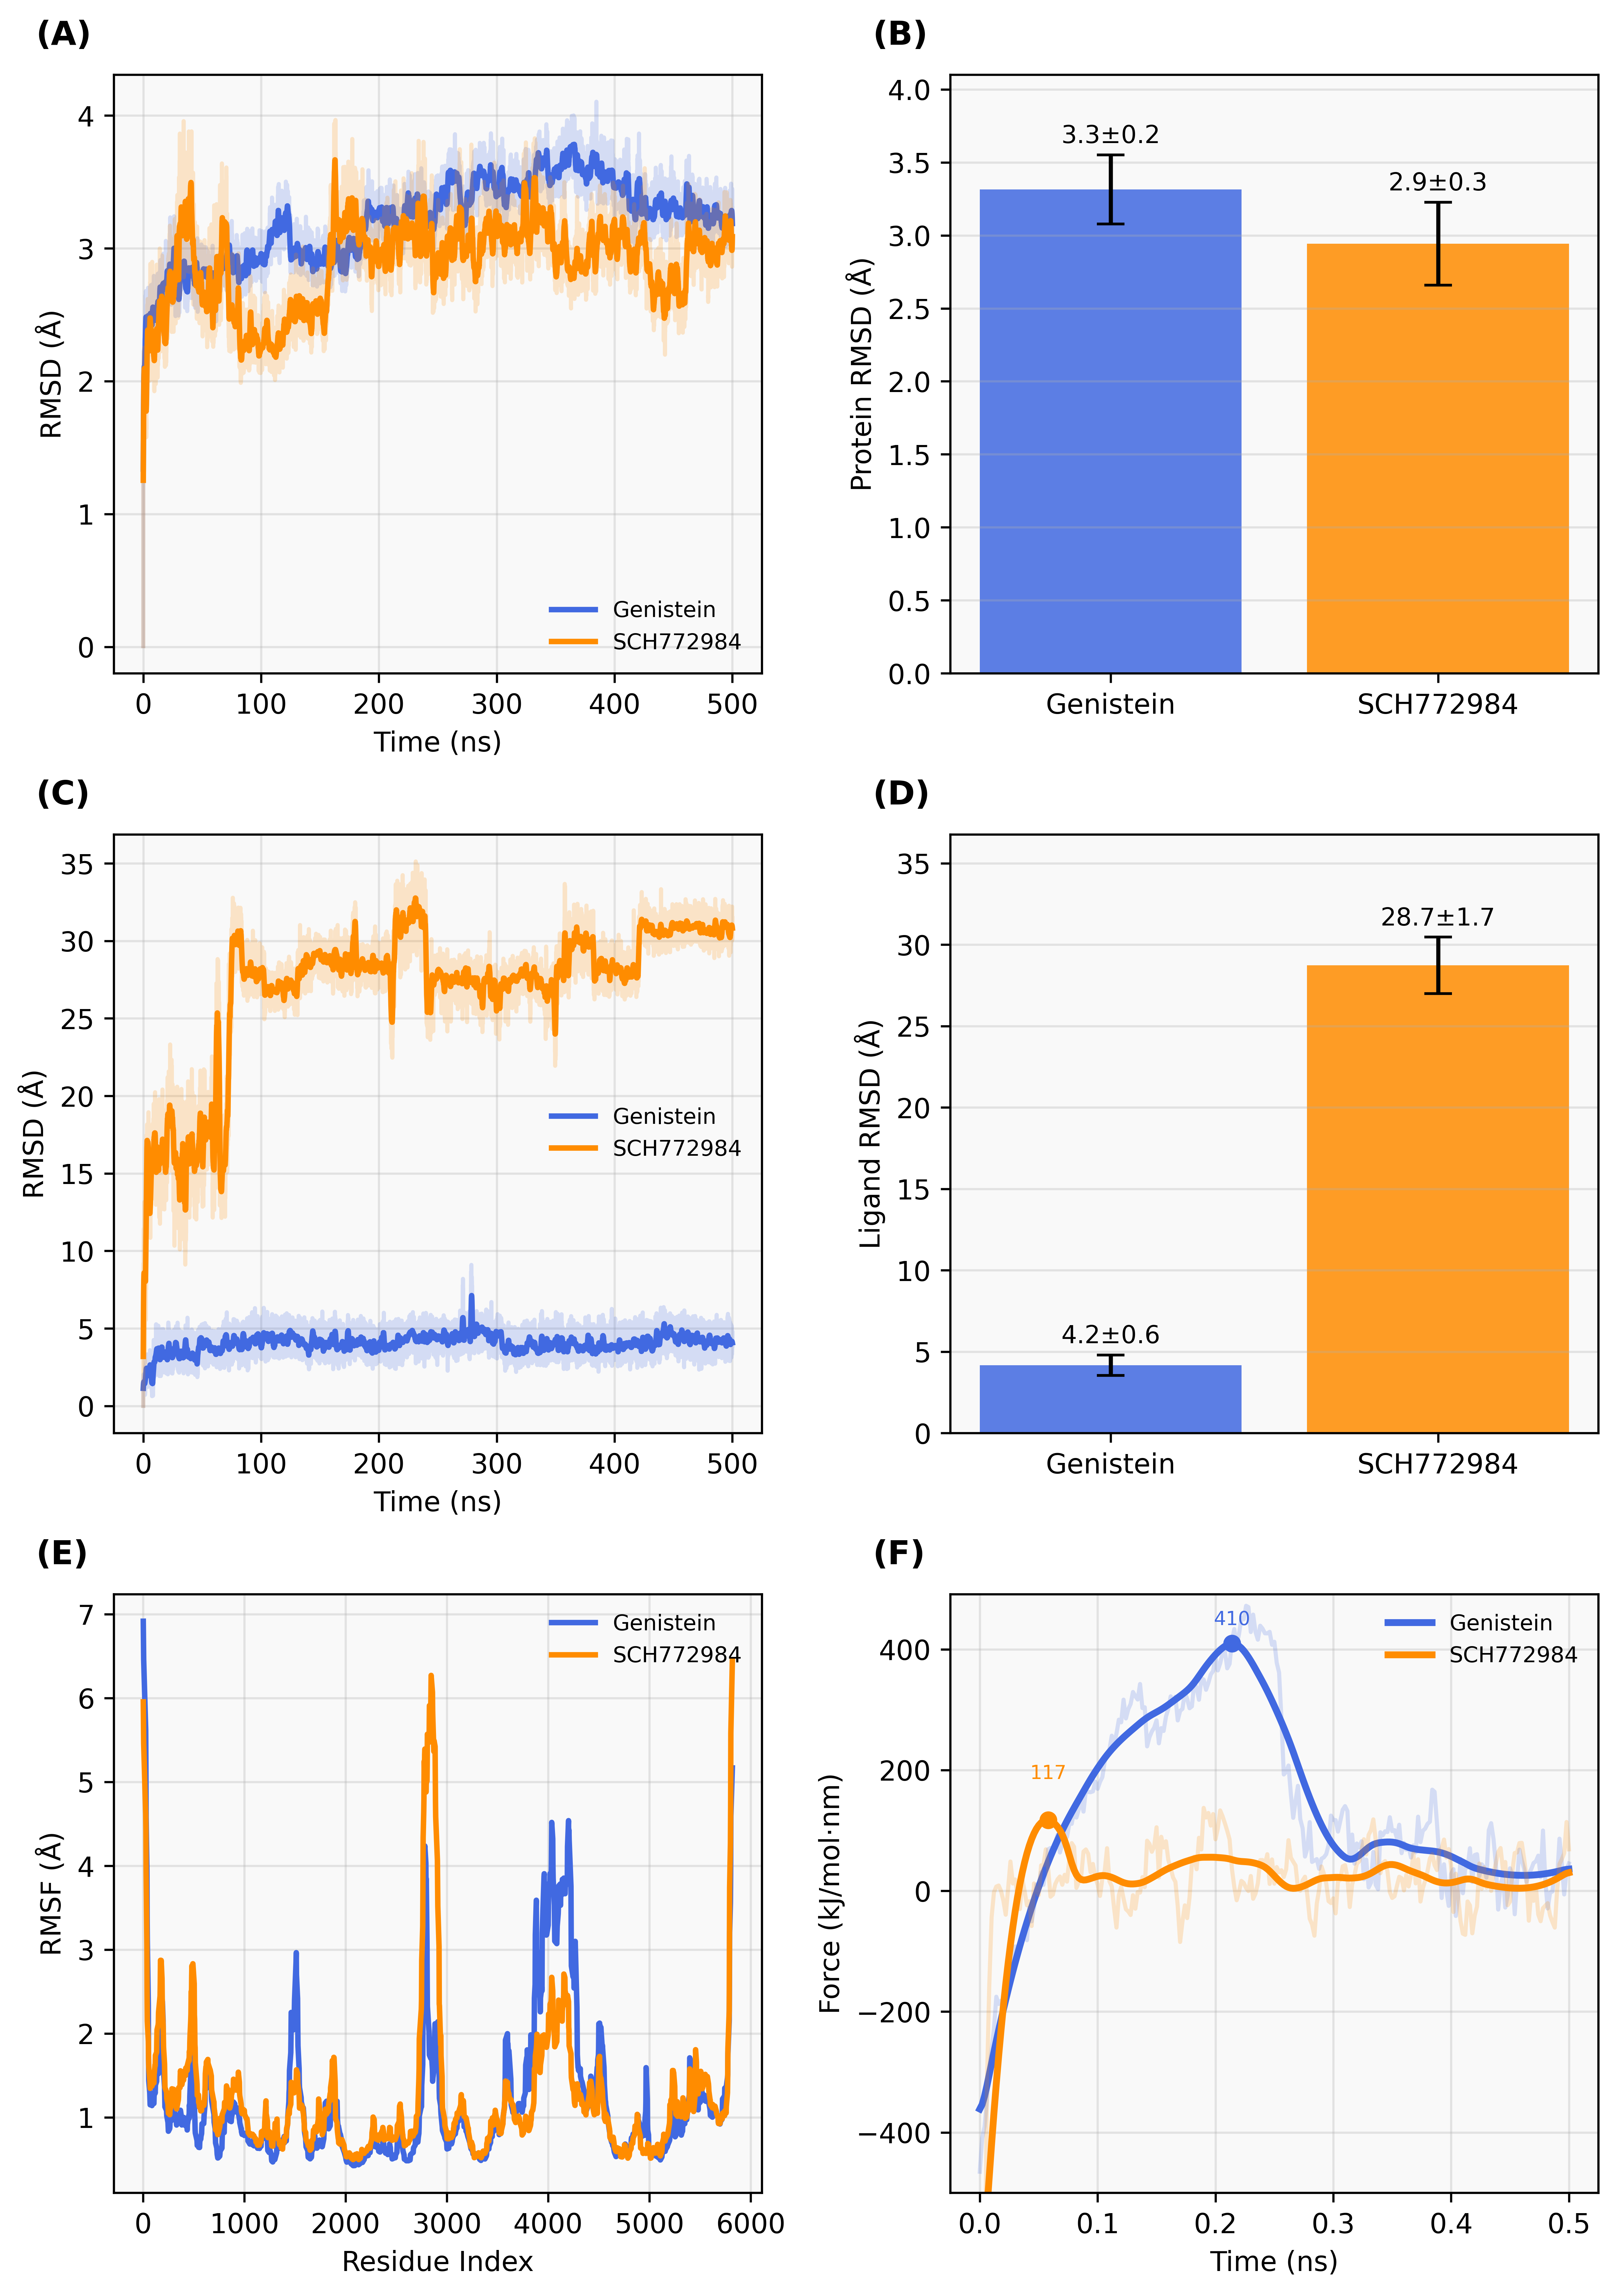


**Figure S2.** Binding dynamics of genistein and SCH772984 in JNK1.

**a**, Protein backbone RMSD over 500 ns. **b**, Mean ± standard deviation (SD) for protein RMSD (100–500 ns). **c**, Ligand RMSD trajectories. **d**, Mean ± SD for ligand RMSD (100–500 ns). **e**, Protein RMSF profiles. **f**, SMD force-time curves showing ligand unbinding behavior.


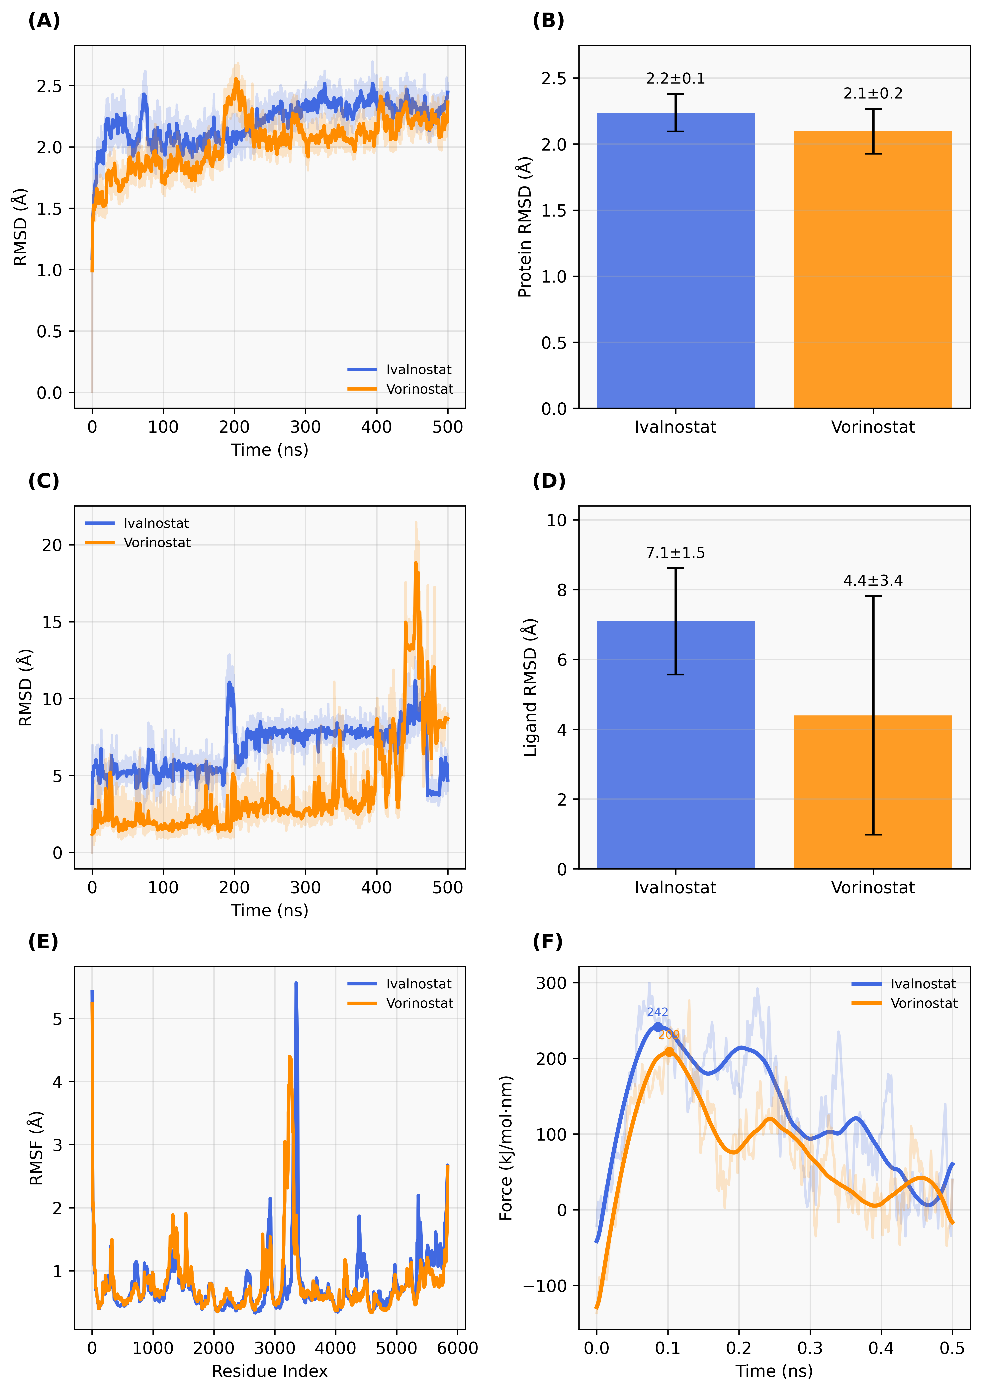


**Figure S3.** Comparative binding dynamics of ivaltinostat and vorinostat**.**

**a**, Protein backbone RMSD during 500-ns simulations. **b**, Mean ± standard deviation (SD) for protein RMSD calculated over 100–500 ns. **c**, Ligand RMSD trajectories showing binding-pose stability. **d**, Mean ± SD for ligand RMSD values. **e**, Per-residue RMSF profiles of the HDAC-ligand complexes. **f**, SMD force-time curves comparing the mechanical strength required to dissociate each ligand from the active site.


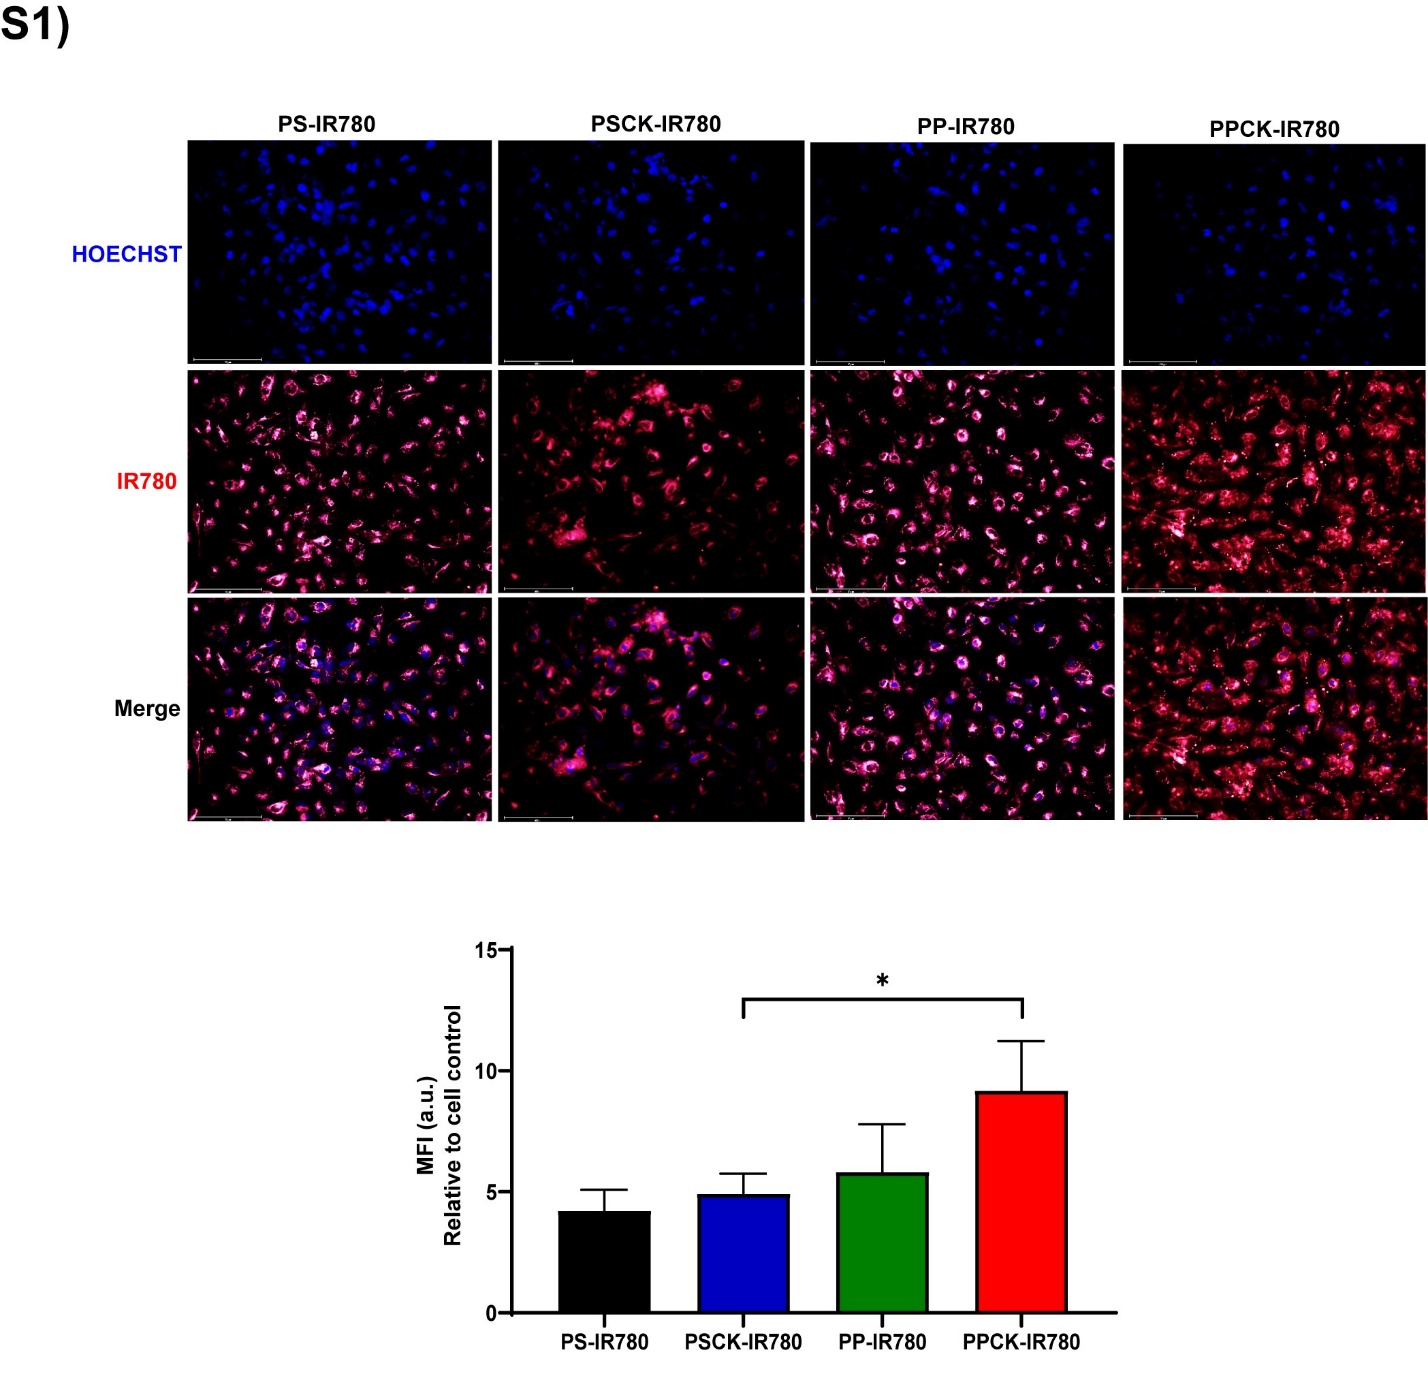


Figure S4. Cellular uptake of non–ROS-responsive formulations and PPCK-IR780.
a. Confocal images of HK-2 cells treated with PS-IR780, PSCK-IR780, PP-IR780, or PPCK-IR780 for 4 h. Hoechst stains nuclei (blue) and IR780 fluorescence is shown in red. Scale bar: 50 µm.
b. MFI quantification shows significantly higher uptake in the PPCK-IR780 group compared to other formulations (p < 0.05). Data = mean ± SD (n = 3).

**Table S1.** Binding energy comparison between the reference and test ligands for HDAC and MAPK targets, with ivaltinostat and genistein showing the most favorable interactions.

| **S. No** | **Ligands** | **CDOCKER Interaction Energy (kcal/mol)** | **MMGBSA Binding Energy (kcal/mol)** |
| --- | --- | --- | --- |
|  | **HDAC Inhibitor** |  |  |
| 1 | Co-crystallized ligand (Vorinostat) | −59.1736 | −18.86 |
| 2 | Trichostatin | −54.4656 | Positive (77.31) |
| 3 | **Ivaltinostat (CG-200745)** | −**74.5785** | −**28.42** |
|  | **Anti-oxidant or TGF-B signaling inhibitor** |  |  |
| 1 | Co-crystallized ligand SCH772984 | −66.1824 | −24.20 |
| 2 | Sulfadimethoxine | −41.9099 | −10.29 |
| 3 | **Genistein** | −**52.6343** | −**21.39** |

**Table S2**. The list of primary and secondary antibodies for immunoblotting

|  | Host | Reactivity | Supplier | Cat. No. |
| --- | --- | --- | --- | --- |
| Bax | Rabbit | Human, Mouse | Cell signaling | #2772 |
| Bcl-2 | Rabbit | Human, Mouse | Cell signaling | #3498 |
| Caspase-3 | Rabbit | Human, Mouse | Cell signaling | #9662 |
| Cleaved caspase-3 | Rabbit | Human, Mouse | Cell signaling | #9661 |
| Erk1/2 | Rabbit | Human, Mouse | Cell signaling | #9102 |
| JNK | Rabbit | Human, Mouse | Cell signaling | #9252 |
| p38 | Rabbit | Human, Mouse | Cell signaling | #9212 |
| Phopho-Erk1/2 | Rabbit | Human, Mouse | Cell signaling | #9101 |
| Phopho JNK | Rabbit | Human, Mouse | Cell signaling | #9251 |
| Phospho p38 | Rabbit | Human, Mouse | Cell signaling | #9215 |
| Phospho Smad2/3 | Rabbit | Human, Mouse | Cell Signaling | #8828 |
| Smad4 | Rabbit | Human, Mouse | Cell Signaling | #38454 |
| Smad2/3 | Rabbit | Human, Mouse | Cell Signaling | #3102 |
| Transforming growth factor-β | Rabbit | Human, Mouse | Cell Signaling | #3711 |
| α-smooth muscle actin | Mouse | Human, Mouse | Sigma-Aldrich | A2547 |
| β-actin | Mouse | Human, Mouse | Sigma-Aldrich | A3854 |

**Table S3.** The list of primer sequences for real-time qPCR

|  | Forward | Reverse |
| --- | --- | --- |
| *mActa2* (αSMA) | ACTGGGACGACATGGAAAAG | CATCTCCAGAGTCCAGCACA |
| *mGapdh* | TGTGTCCGTCGTGGATCTGA | GATGCCTGCTTCACCACCTT |
| *mIl-6* | ACAACCACGGCCTTCCCTACTT | CACGATTTCCCAGAGAACATGTG |
| *mCcl2* (MCP-1) | ATCCCAATGAGTAGGCTGGAGAGC | CAGAAGTGCTTGAGGTGGTTGTG |
| *mFn1* (fibronectin) | ACACGGTTTCCCATTACGCCAT | AATGACCACTGCCAAAGCCCAA |
| *mTgfb1* (TGFβ) | CAACAATTCCTGGCGTTACCTTGG | GAAAGCCCTGTATTCCGTCTCCTT |
| *mTnf* (TNFα) | AGCCCCCAGTCTGTATCCTT | GGTCACTGTCCCAGCATCTT |
